# Supplementary material for: Evaluation of the standard procedure for the treatment of periprosthetic joint infections (PJI) in Germany - results of a survey within the EndoCert initiative
Source: Springer Nature journal article supplement (doi:10.1186/s12891-020-03670-y), 2020-10-19
Supplement: MOESM1 [file 18499874]

## Principles of treatment for septic endoprosthesis revisions

| Type of endoprosthetics center                               | Registration number |
|--------------------------------------------------------------|---------------------|
| <input type="checkbox"/> EPZ <input type="checkbox"/> EPZmax | EPZ - -             |

### 1. Procedures to retain the prosthesis

The endoprosthesis is maintained postoperatively until \_\_\_\_ weeks after implantation at the latest.

- without changing parts                       with changing parts (e.g. PE-Inlay)

Comment:

### 2. Single-stage septic revision Multiple answers possible

#### 2.1 Procedure with single-stage revision

- Single-stage revisions are not carried out  
 Single-stage revisions take place at:
  - early Infection
  - depending on defect
  - age-dependent
  - others:

#### 2.2 Implants for single-stage revision

- mainly cementless  
 mainly cemented (with ready-made cement mixture)  
 mainly cemented with individual Admixture of antibiotics to cement  
 others:

### 3. Two-stage septic revision Multiple answers possible

#### 3.1 Procedure for a two-stage revision

Interval: \_\_\_\_ Days (time between prosthesis removal and reimplantation)

##### Spacer after removal

- no spacer (Girdlestone)  
 Metal spacer
  - one-part
  - multi-part Cement spacer
  - individually formed
  - Spacer over mould

##### Implant selection for the final restoration for a two-stage revision (reimplantation)

- mainly cementless  
 mainly cemented  
 mainly hybrid

### 3. Two-stage septic revision Multiple answers possible

Implant choice: If cement is used

- Cemented (with ready-mixed cement)
- mainly cemented with individual  
Admixture of antibiotics to cement

Special concept of the clinic

- is available
- is not available

Insofar as bone augmentation is performed

- Allograft
- Ceramic bone graft substitute material
- Combination of both concepts
- Admixture of antibiotics

comment:

### 4. Removal of the endoprosthesis

4.1 Procedure for taking samples

- number of samples: \_\_\_\_
- scheme of the sampling sites:  yes  no (see appendix: Example scheme HiCare)

4.2 Duration of the use of postoperative antibiotics

- after removal: \_\_\_\_ days
- after implantation of the new endoprosthesis: \_\_ days
- always individual after removal
- after implantation of the new endoprosthesis always individually

comment:

### 5. Sample before reimplantation?

Do you take biological material for infection diagnosis after removal and before reimplantation?

- no
- yes: puncture
- yes: microbiology - sample (tissue sample)
- yes: microbiology - + histology - sample

### 6. Please name the following persons: Multiple answers possible

Manager EPZ:  
Coordinator EPZ:
